# Supplementary material for: Different human vaccine adjuvants promote distinct antigen-independent immunological signatures tailored to different pathogens
Source: PubMed Central journal article supplement (PMC4726129; doi:10.1038/srep19570), 2016-01-21

## **Different human vaccine adjuvants promote distinct antigen-independent immunological signatures tailored to different pathogens**

Niels Peter H. Knudsen<sup>a\*</sup>, Anja Olsen<sup>a</sup>, Cecilia Buonsanti<sup>b</sup>, Frank Follmann<sup>a</sup>, Yuan Zhang<sup>c</sup>, Rhea N. Coler<sup>d</sup>, Christopher B. Fox<sup>d</sup>, Andreas Meinke<sup>e</sup>, Ugo D'Oro<sup>b</sup>, Daniele Casini<sup>b</sup>, Alessandra Bonci<sup>b</sup>, Rolf Billeskov<sup>a</sup>, Ennio De Gregorio<sup>b</sup>, Rino Rappuoli<sup>b</sup>, Ali M. Harandi<sup>c</sup>, Peter Andersen<sup>a</sup> and Else Marie Agger<sup>a\*</sup>

<sup>a</sup>Department of Infectious Disease Immunology, Statens Serum Institut, Copenhagen, Denmark

<sup>b</sup>Novartis Vaccines and Diagnostics s.r.l (a GSK Company), Siena, Italy

<sup>c</sup>Department of Microbiology and Immunology, University of Gothenburg, Gothenburg, Sweden

<sup>d</sup>Infectious Disease Research Institute, Seattle, WA, USA

<sup>e</sup>Valneva Austria GmbH, Vienna, Austria

\*Corresponding Authors

|                         |                                |
|-------------------------|--------------------------------|
| Niels Peter H. Knudsen, | NPK@ssi.dk                     |
| Anja Olsen,             | AOL@ssi.dk                     |
| Cecilia Buonsanti,      | cecilia.x.buonsanti@gsk.com    |
| Frank Follmann,         | FRF@ssi.dk                     |
| Yuan Zhang,             | yuan.zhang@gu.se               |
| Rhea N. Coler,          | Rhea.Coler@idri.org            |
| Christopher B. Fox,     | Chris.Fox@idri.org             |
| Andreas Meinke,         | Andreas.MEINKE@valneva.com     |
| Ugo D'Oro,              | ugo.x.d'oro@gsk.com            |
| Daniele Casini,         | daniele.x.casini@gsk.com       |
| Alessandra Bonci,       | alessandra.x.bonci@gsk.com     |
| Rolf Billeskov          | ROB@ssi.dk                     |
| Ennio De Gregorio,      | ennio.de_gregorio@novartis.com |
| Rino Rappuoli,          | rino.r.rappuoli@gsk.com        |
| Ali M. Harandi,         | ali.harandi@microbio.gu.se     |
| Peter Andersen,         | PA@ssi.dk                      |
| Else Marie Agger,       | EAG@ssi.dk                     |

**Figure 1S.** icFACS analysis of vaccine responses measured by cytokine expression in HA specific CD4 T-cells. Mice were vaccinated 3 times s.c. with 1  $\mu\text{g}$  of HA formulated in Alum, MF59<sup>®</sup> CAF01, GLA-SE or IC31<sup>®</sup> with 3 week intervals. Splenocytes from four individual mice, isolated two weeks after the third immunization, were stimulated with 1  $\mu\text{g}/\text{ml}$  of recombinant HA O/N + 4h in the presence of BFA. Cells were gated as follows: live > singlets > lymphocytes > CD3<sup>+</sup> > CD4<sup>+</sup> versus CD8<sup>+</sup>. Cytokine-producing cells (IFN- $\gamma$ , IL-17 or IL-4/IL-13) within the CD4<sup>+</sup>CD44<sup>high</sup> population were measured. Bar charts show the frequency of each cytokine subset being CD44<sup>high</sup> out of the total CD4 T cell population. Bars represent the mean + SEM of four individual mice. The background from non-stimulated samples have been subtracted.

**Figure 2S.** An icFACS analysis of vaccine responses measured by cytokine co-expression in H56 or MOMP-specific CD4 T-cells. Mice were vaccinated 3 times s.c. with 5  $\mu\text{g}$  of H56 or MOMP formulated in Alum, MF59<sup>®</sup> CAF01, GLA-SE or IC31<sup>®</sup> with 3 week intervals. Splenocytes from four individual mice, isolated two weeks after the third immunization, were stimulated with 2  $\mu\text{g}/\text{ml}$  of recombinant H56 or MOMP for 1h + 5h in the presence of BFA. Cells were gated as follows: singlets > lymphocytes > CD4<sup>+</sup> versus CD8<sup>+</sup>. Cytokine-producing cells (IFN- $\gamma$ , TNF- $\alpha$ , and IL-2) within the CD4<sup>+</sup>CD44<sup>high</sup> population were divided into seven distinct subpopulations based on Boolean gating and are shown as bar and pie charts. Bar charts show the frequency of each cytokine subset being CD44<sup>high</sup> out of the total CD4 T cell population. Bars represent the mean + SEM of four individual mice. Pie charts show the relative contribution of each cytokine subpopulation to the Ag-responsive CD4 T cell population. The background from non-stimulated samples have been subtracted. The experiment was repeated with similar results.

Supplementary Figure S1

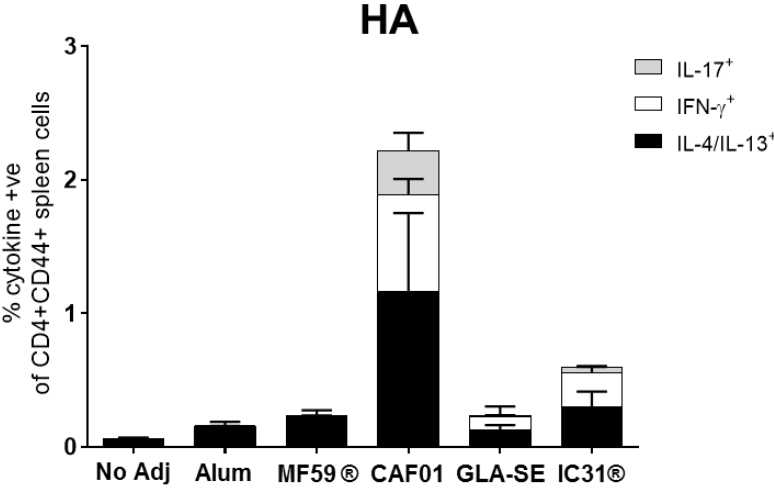

Supplementary Figure S2

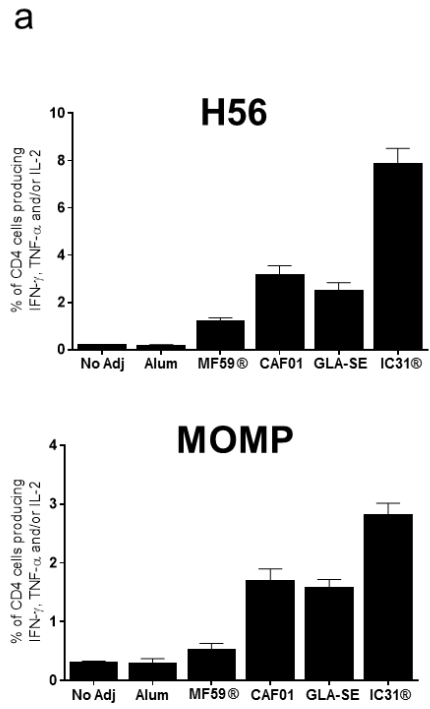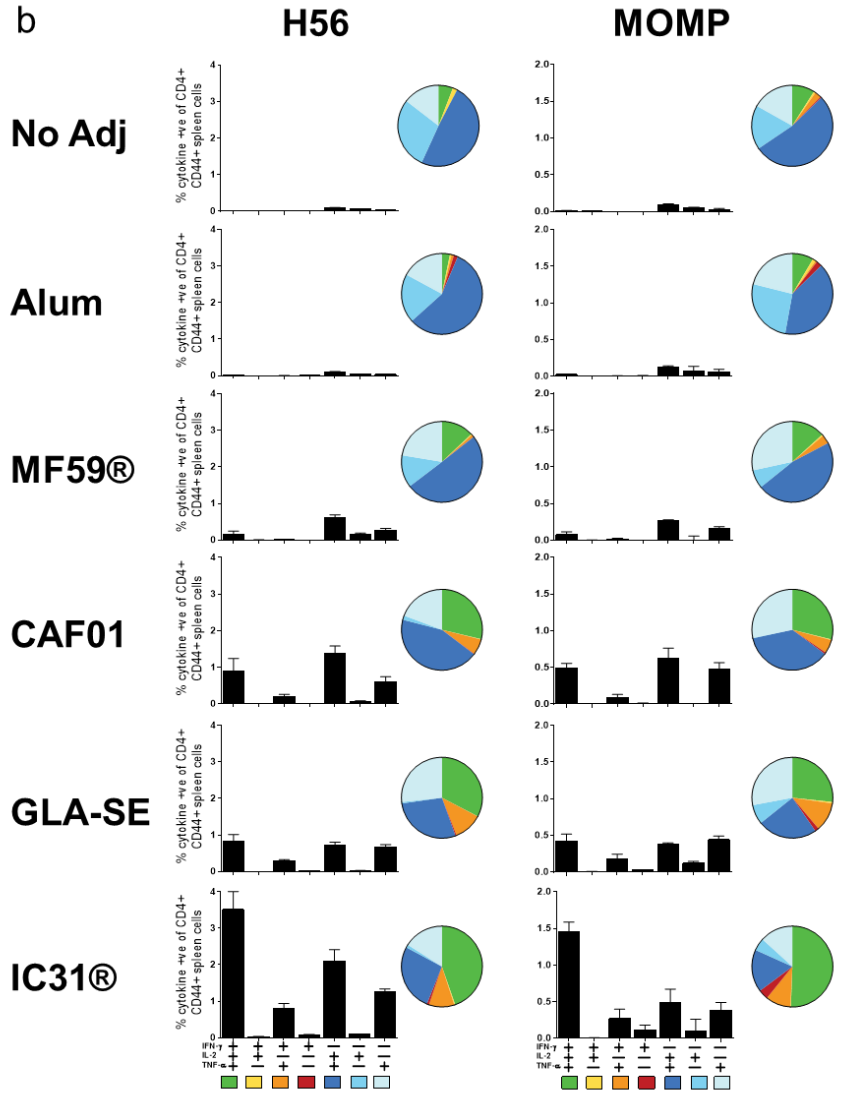

Supplement: srep19570-s1.pdf [file srep19570-s1.pdf]
